# Supplementary material for: Seaweed biomass derived (Ni,Co)/CNT nanoaerogels: efficient bifunctional electrocatalysts for oxygen evolution and reduction reactions
Source: Royal Society of Chemistry journal article supplement (doi:10.1039/c6ta00591h), 2016-01-01
Supplement: c6ta00591h1.pdf [file c6ta00591h1.pdf]

## Supporting Information

### **Seaweed Biomass Derived (Ni,Co)/CNT Nanoaerogels: Efficient Bifunctional Electrocatalysts for Oxygen Evolution and Reduction Reactions**

Na Ma, Yi (Alec) Jia, Xianfeng Yang, Xilin She, Longzhou Zhang,  
Zhi Peng, Xiangdong Yao and Dongjiang Yang

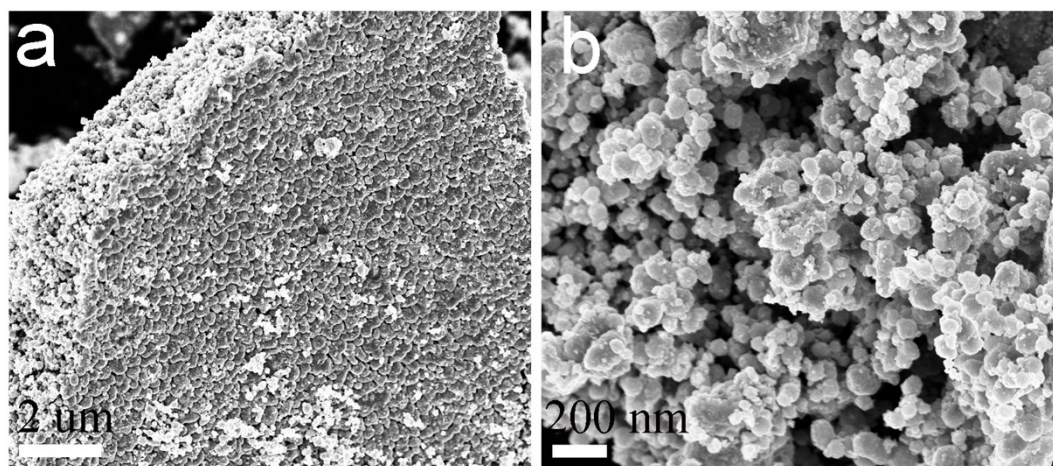

**Figure S1.** FESEM images of Ni/NiO/NiCo<sub>2</sub>O<sub>4</sub>/N-As.

**Table S1.** The Brunauer-Emmett-Teller (BET) surface area, pore volume and average pore size of (Ni,Co)/N-CNT-As samples.

| Sample                                               | Ni/NiO/NiCo <sub>2</sub> O <sub>4</sub> /<br>N-CNT-As | Ni/NiCo <sub>2</sub> O <sub>4</sub> /N-<br>CNT-As | NiCo <sub>2</sub> O <sub>4</sub> /N-<br>CNT-As | NiO/NiCo <sub>2</sub> O <sub>4</sub> /N<br>-CNT-As |
|------------------------------------------------------|-------------------------------------------------------|---------------------------------------------------|------------------------------------------------|----------------------------------------------------|
| Surface<br>area<br>(m <sup>2</sup> g <sup>-1</sup> ) | 193                                                   | 208                                               | 222                                            | 189                                                |
| Pore<br>volume(c<br>m <sup>3</sup> g <sup>-1</sup> ) | 1.055                                                 | 1.650                                             | 1.411                                          | 0.805                                              |
| Average<br>pore size<br>(nm)                         | 16.1                                                  | 15.3                                              | 15.6                                           | 11.9                                               |

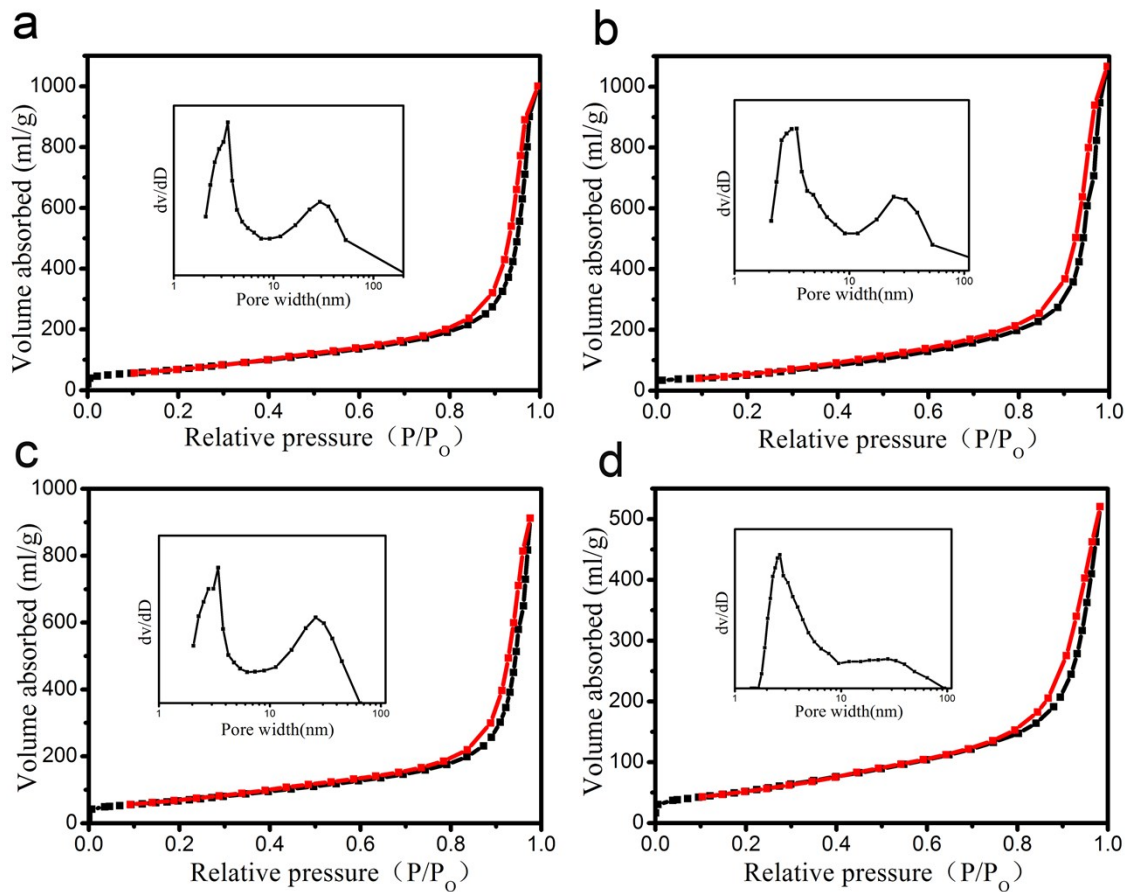

**Figure S2.** Nitrogen adsorption-desorption isotherms and inset pore size distributions of (a) Ni/NiO/NiCo<sub>2</sub>O<sub>4</sub>/N-CNT-As. (b) Ni/NiCo<sub>2</sub>O<sub>4</sub>/N-CNT-As. (c) NiCo<sub>2</sub>O<sub>4</sub>/N-CNT-As. (d) NiO/NiCo<sub>2</sub>O<sub>4</sub>/N-CNT-As.

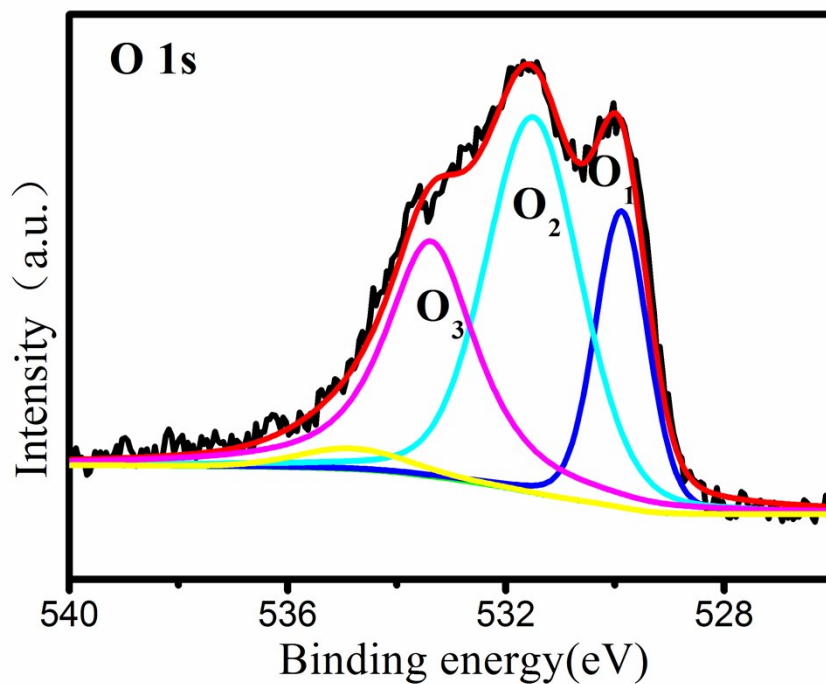

**Figure S3.** High resolution XPS for O 1s peak of Ni/NiO/NiCo<sub>2</sub>O<sub>4</sub>/N-CNT-As.

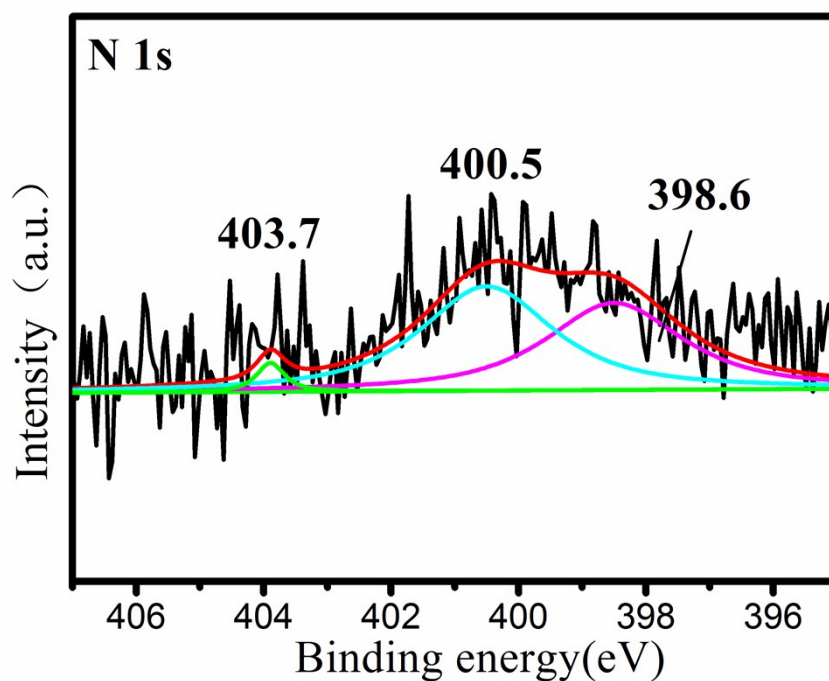

**Figure S4.** High resolution XPS for N 1s peak of Ni/NiO/NiCo<sub>2</sub>O<sub>4</sub>/N-CNT-As.

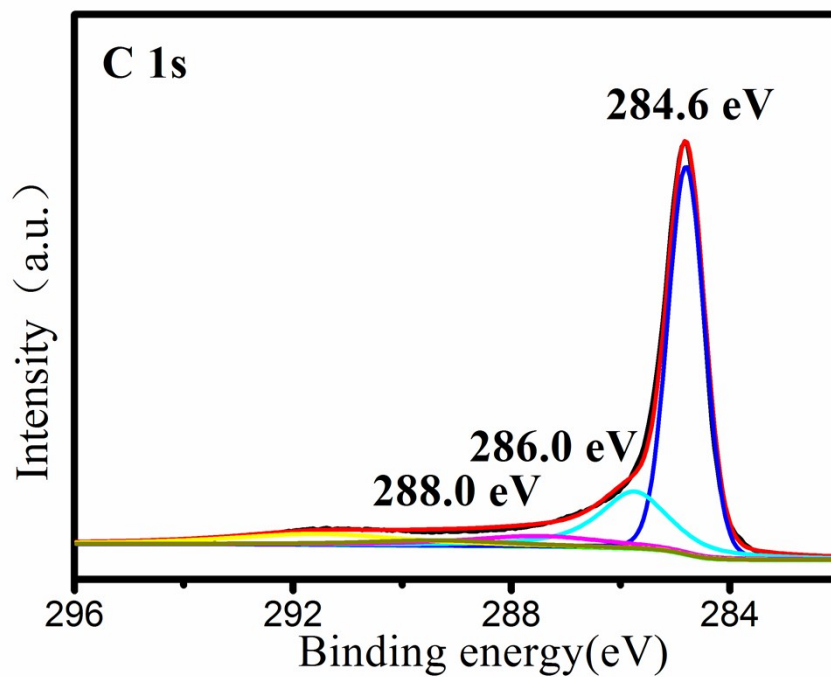

**Figure S5.** High resolution XPS for C 1s of Ni/NiO/NiCo<sub>2</sub>O<sub>4</sub>/N-CNT-As.

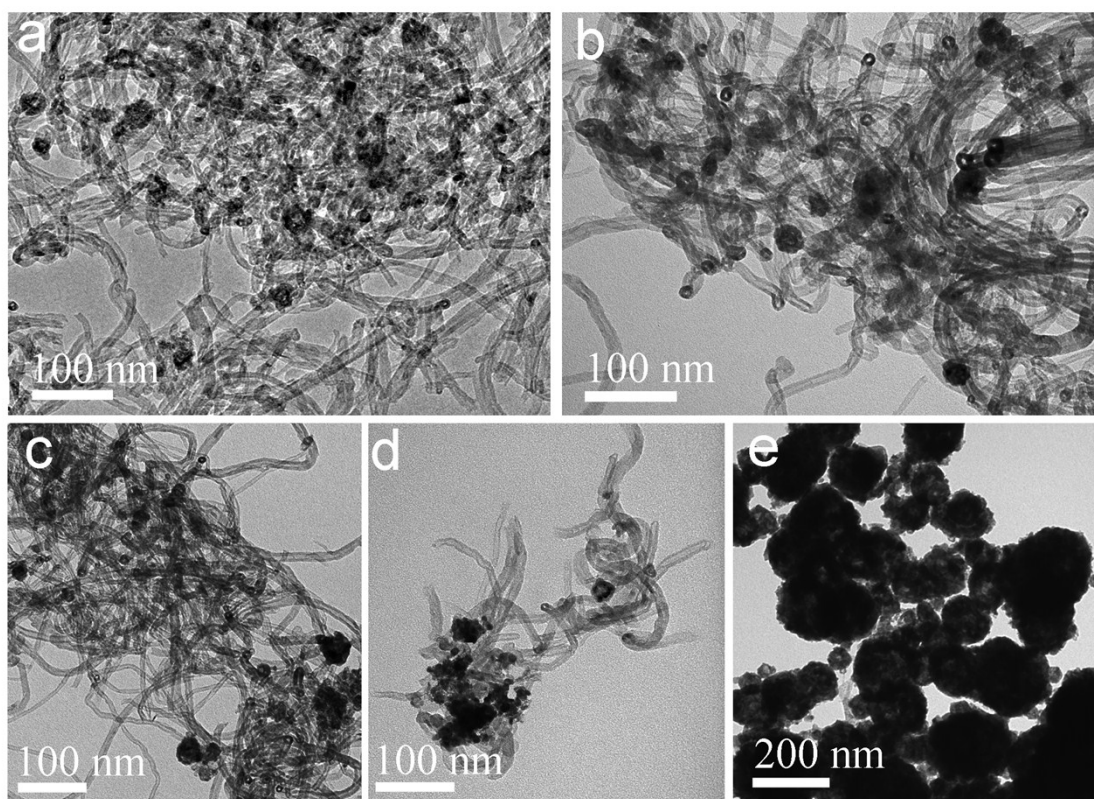

**Figure S6.** TEM images of (a) Ni/NiO/NiCo<sub>2</sub>O<sub>4</sub>/N-CNT-As. (b) Ni/NiCo<sub>2</sub>O<sub>4</sub>/N-CNT-As. (c) NiCo<sub>2</sub>O<sub>4</sub>/N-CNT-As. (d) NiO/NiCo<sub>2</sub>O<sub>4</sub>/N-CNT-As. (e) Ni/NiO/NiCo<sub>2</sub>O<sub>4</sub>/N-As.

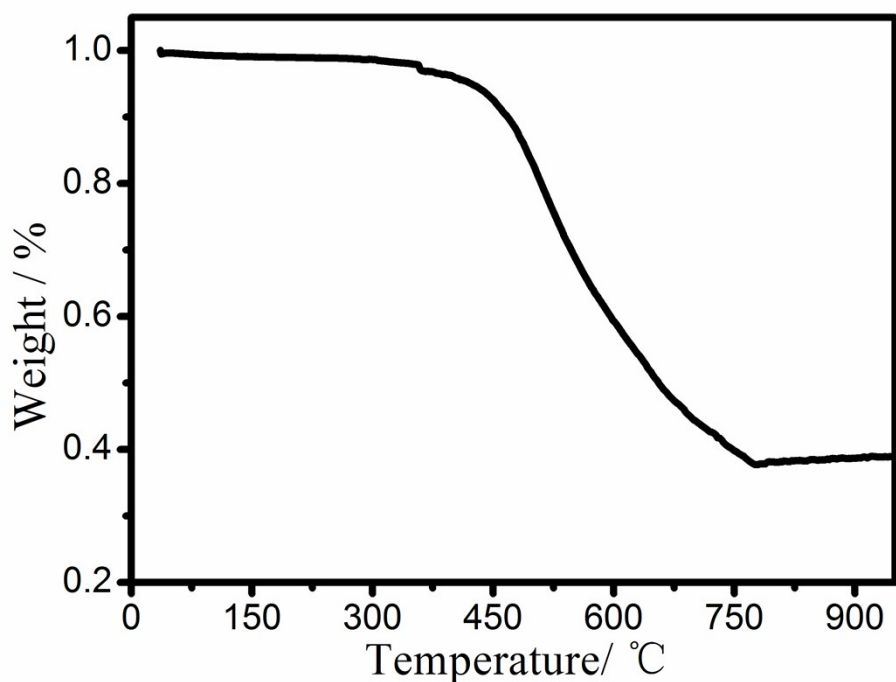

**Figure S7.** TGA weight change curves of Ni/NiO/NiCo<sub>2</sub>O<sub>4</sub>/N-CNT-As tested in air with a ramp rate of 10 °C/min.

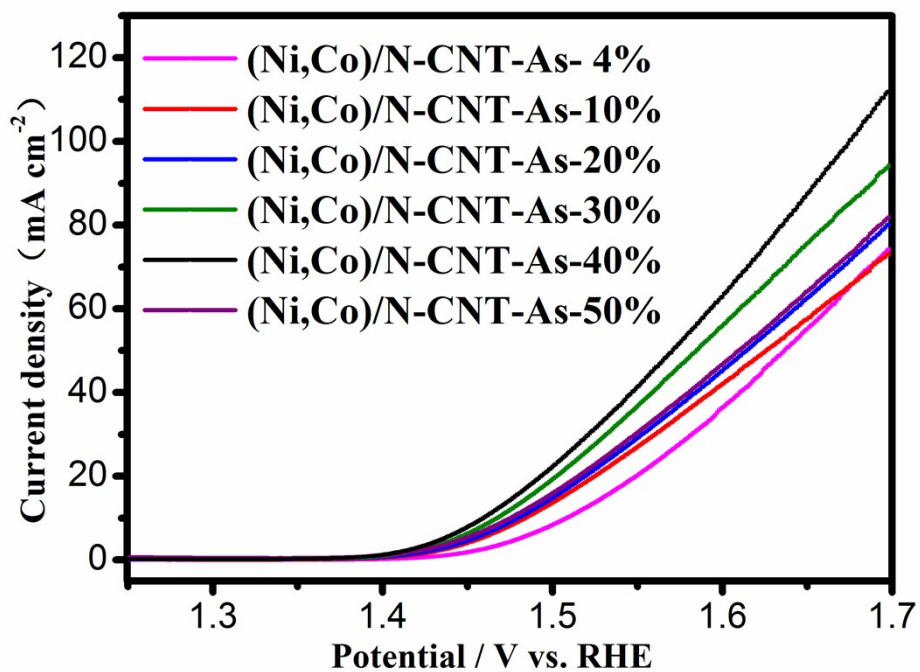

**Figure S8.** LSV plots of Ni/NiO/NiCo<sub>2</sub>O<sub>4</sub>/N-CNT-As samples with different amounts

of CNTs in 1 M KOH.

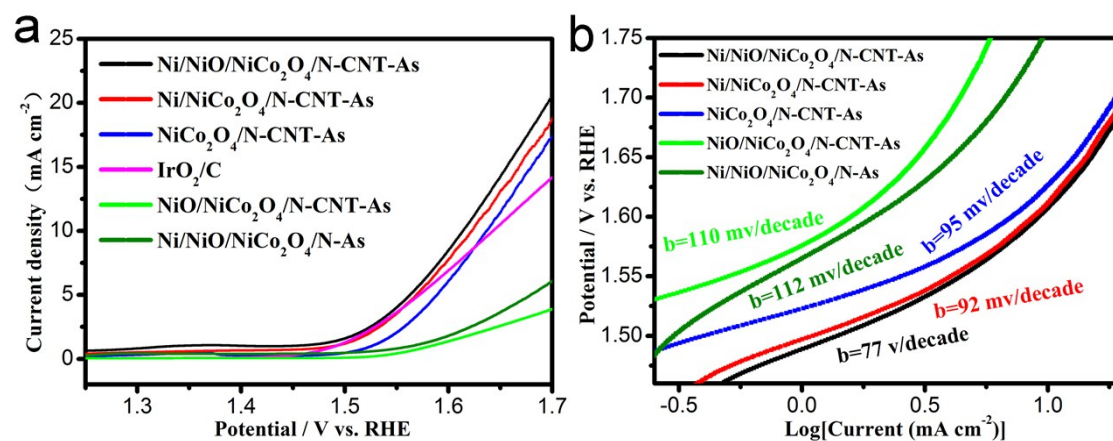

**Figure S9.** (a) (Ni,Co)/N-CNT-As samples and commercial IrO<sub>2</sub>/C at 10mV s<sup>-1</sup> in 0.1 M KOH. (b) Tafel plots for (Ni,Co)/N-CNT-As samples in 0.1M KOH.

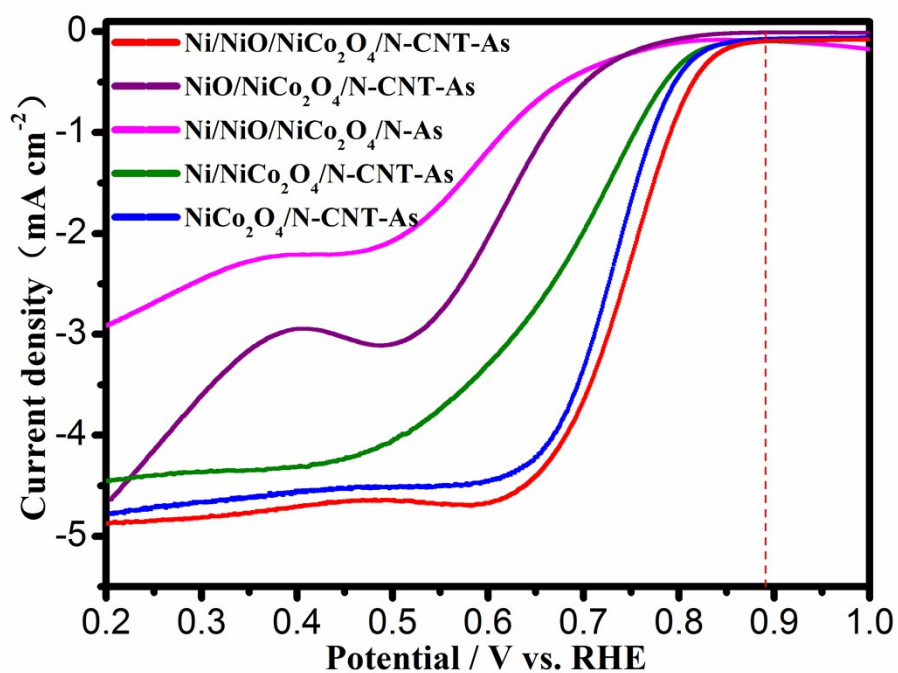

**Figure S10.** LSV plots of (Ni,Co)/N-CNT-As samples in 0.1 M KOH.

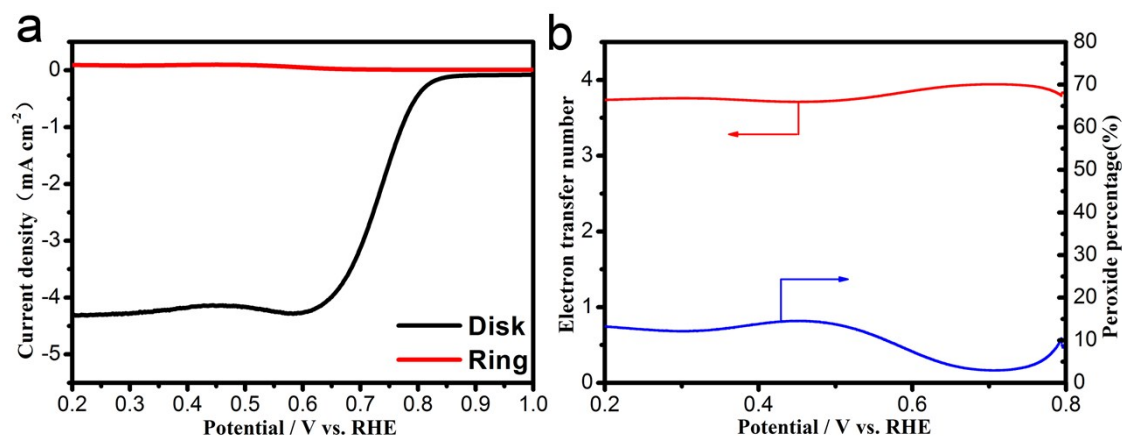

**Figure S11.** (a) Rotating ring-disk electrode (RRDE) voltammograms recorded with the Ni/NiO/NiCo<sub>2</sub>O<sub>4</sub>/N-CNT-As in O<sub>2</sub>-saturated 0.1 M KOH at 1600 rpm. Disk current ( $I_D$ ) is shown on the lower half and the ring current ( $I_R$ ) is shown on the upper half of the graph. (b) The calculated percentage of peroxide and the electron transfer number ( $n$ ).

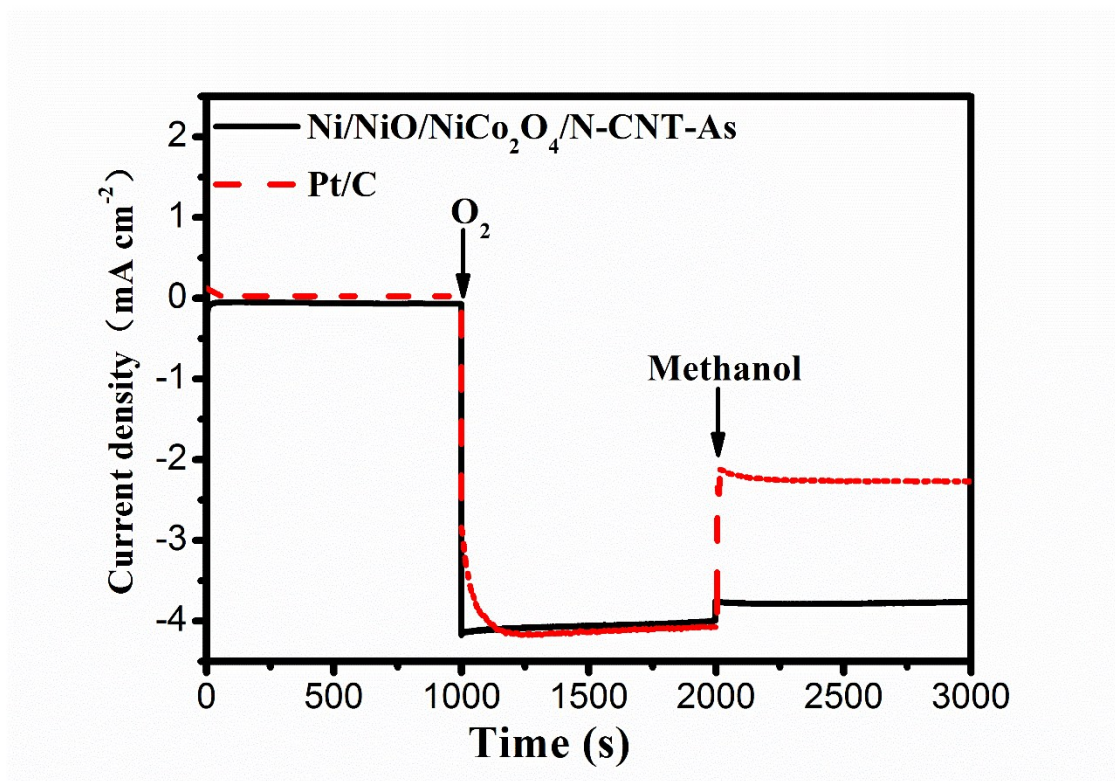

**Figure S12.** Methanol crossover resistance (at 0.69 V vs.RHE) test of Ni/NiO/NiCo<sub>2</sub>O<sub>4</sub>/N-CNT-As and 20% Pt/C in 0.1 M KOH.



**Table S2.** Comparison of OER performance of Ni/NiO/NiCo<sub>2</sub>O<sub>4</sub>/N-CNT-As with reported metal oxides catalysts in 1 M KOH solution.

| Sample                                            | Onset E(V) | $\eta@10\text{mAcm}^{-2}$ (V) | $j@\eta=0.3$ V (mAcm <sup>-2</sup> ) | Loading (mgcm <sup>-2</sup> ) | Tafel slopes (mV/Dec) | References                                          |
|---------------------------------------------------|------------|-------------------------------|--------------------------------------|-------------------------------|-----------------------|-----------------------------------------------------|
| Ni/NiO/NiCo <sub>2</sub> O <sub>4</sub> /N-CNT-As | ~1.43      | 0.24                          | 33                                   | 0.24                          | 45                    | This work                                           |
| IrO <sub>2</sub> /C                               | ~1.47      | 0.35                          | -                                    | 0.24                          | -                     | This work                                           |
| NCNT/CoO-NiO-NiCo                                 | ~1.46      | 0.27                          | 19                                   | 0.21                          | 40                    | <i>Angew. Chem., Int. Ed.</i> , 2015, 54, 9654-9658 |
| Co <sub>3</sub> O <sub>4</sub> /N-rmGO            | -          | 0.31                          | -                                    | 1                             | 67                    | <i>Nat. Mater.</i> , 2011,10,780-786                |

Note:  $\eta$  is the overpotential and  $j$  is Current Density.

**Table S3.** Comparison of bifunctional oxygen electrode activities of Ni/NiO/NiCo<sub>2</sub>O<sub>4</sub>/N-CNT-As with reported metal oxides catalysts in 0.1 M KOH solution.

| Sample                                                                                     | Onset OER<br>E(V)<br>(vsRHE) | E <sub>OER</sub> <sup>a</sup> (V)<br>@10 mA<br>cm <sup>-2</sup> | E <sub>ORR</sub> <sup>b</sup> (V)<br>@ -3 mA<br>cm <sup>-2</sup> | Oxygen<br>electrode<br>(E <sub>OER</sub> -E <sub>ORR</sub> )<br>ΔE <sup>c</sup> (V) | Loading<br>(mg cm <sup>-2</sup> ) | References                                              |
|--------------------------------------------------------------------------------------------|------------------------------|-----------------------------------------------------------------|------------------------------------------------------------------|-------------------------------------------------------------------------------------|-----------------------------------|---------------------------------------------------------|
| Ni/NiO/NiCo <sub>2</sub> O <sub>4</sub> /<br>N-CNT-As                                      | ~1.51                        | 1.60                                                            | 0.74                                                             | 0.87                                                                                | 0.24                              | Thiswork                                                |
| NCO-A <sub>1</sub>                                                                         | ~1.52                        | 1.62                                                            | 0.78                                                             | 0.84                                                                                | 0.90                              | <i>Nanoscale</i> ,<br>2014, 6, 3173-3181                |
| NiCo <sub>2</sub> O <sub>4</sub>                                                           | ~1.55                        | 1.72                                                            | 0.75                                                             | 0.97                                                                                | -                                 | <i>J. Mater. Chem. A</i> ,<br>2013, 1, 12170-12177      |
| NiCo <sub>2</sub> O <sub>4</sub> /G                                                        | ~1.54                        | 1.67                                                            | 0.54                                                             | 1.13                                                                                | 0.41                              | <i>J. Mater. Chem. A</i> ,<br>2013, 1, 4754-4762        |
| Co <sub>3</sub> O <sub>4</sub> /2.7Co <sub>2</sub> MnO <sub>4</sub>                        | ~1.58                        | 1.77                                                            | 0.68                                                             | 1.09                                                                                | 0.093                             | <i>Nanoscale</i> ,<br>2013, 5, 5312-5315                |
| macro/meso-NC-NH <sub>3</sub> <sup>+</sup><br>Co <sub>3</sub> O <sub>4</sub> microtrepangs | ~1.67                        | ~1.72                                                           | ~0.82                                                            | ~0.90                                                                               | 0.255                             | <i>Energy<br/>Environ. Sci.</i> ,<br>2015, 8, 3274-3282 |
| Co <sub>3</sub> O <sub>4</sub> /C fiber                                                    | ~1.53                        | -                                                               | -                                                                | -                                                                                   | 0.30                              | <i>Nanoscale</i> ,<br>2015, 7, 1830-1838                |

Note: <sup>a</sup> E<sub>OER</sub>: the potential at an OER current density of 10 mA cm<sup>-2</sup>. <sup>b</sup> E<sub>ORR</sub>: the potential at an ORR current density of -3 mA cm<sup>-2</sup>. <sup>c</sup> ΔE: the difference of the potentials between E<sub>ORR</sub> and E<sub>OER</sub>.

**Table S4.** A comparison of the Zn-air battery performance of this work with recent literatures in terms of the charge voltage.

| Sample                                                                                  | Voltage of charge (initial)<br>v  | Voltage of charge (final)<br>v | Voltage gap between discharge and charge (V) | References                                          |
|-----------------------------------------------------------------------------------------|-----------------------------------|--------------------------------|----------------------------------------------|-----------------------------------------------------|
| Ni/NiO/NiCo <sub>2</sub> O <sub>4</sub> /N-CNT-As                                       | 1.95<br>(5A/g)                    | 1.94                           | 0.75                                         | Thiswork                                            |
| Ni/NiO/NiCo <sub>2</sub> O <sub>4</sub> /N-CNT-As                                       | 1.95<br>(10 A/g)                  | 1.90                           | 0.75                                         | Thiswork                                            |
| Co <sub>3</sub> O <sub>4</sub> /C fiber                                                 | ~2.1<br>(2 mA/cm <sup>2</sup> )   | ~2.1                           | ~0.9                                         | <i>Nanoscale</i> ,<br>2015,7,1830-1838              |
| Co <sub>3</sub> O <sub>4</sub> /C fiber mat                                             | ~2.04<br>(20 mA/cm <sup>2</sup> ) | ~2.04                          | ~0.85                                        | <i>Nanoscale</i> ,<br>2015,7,1830-1838              |
| NCNT/CoO-NiO-NiCo                                                                       | ~2.1<br>(20 mA/cm <sup>2</sup> )  | -                              | ~0.9                                         | <i>Angew. Chem., Int. Ed.</i> , 2015, 54, 9654-9658 |
| MnO <sub>2</sub> and CNT composite                                                      | ~2.6                              | ~2.73                          | 1.5                                          | <i>Electrochim. Acta</i> ,<br>2012, 69,295-300      |
| Co <sub>3</sub> O <sub>4</sub> NP modified MnO <sub>2</sub> Nanotubes                   | ~2.1                              | ~2.2                           | ~0.85                                        | <i>Nanoscale</i> ,<br>2013,5,4657-4661              |
| Co <sub>3</sub> O <sub>4</sub> NC/N-CNT                                                 | 2.16                              | -                              | 1.02                                         | <i>ChemSusChem</i> ,<br>2015,8,3129-3138            |
| macro/meso-NC-NH <sub>3</sub> <sup>+</sup> Co <sub>3</sub> O <sub>4</sub> microtrepangs | -                                 | ~2.0                           | 0.7                                          | <i>Energy Environ. Sci.</i> ,<br>2015,8, 3274-3282  |
| Co <sub>3</sub> O <sub>4</sub> NW                                                       | 2.0                               | -                              | 1.02                                         | <i>Adv. Energy Mater.</i> , 2014, 4, 1301389        |
